# Supplementary material for: Multi-Omic Signatures of Sarcoidosis and Progression in Bronchoalveolar Lavage Cells
Source: PubMed Central journal article supplement — bioRxiv. 2023 Jan 27:2023.01.26.525601. Preprint. [Version 1] doi: 10.1101/2023.01.26.525601 (PMC9901011; doi:10.1101/2023.01.26.525601), 2023-01-27

**A**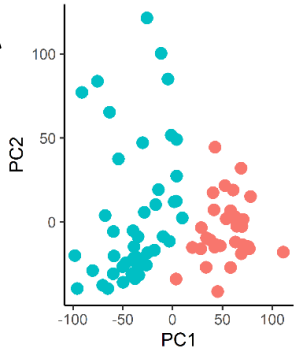**B**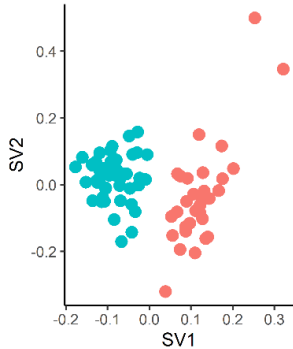**C**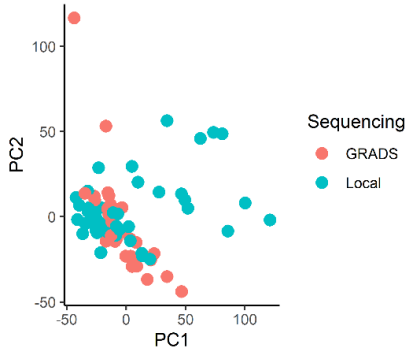

Supplement: media-2.pdf [file media-2.pdf]
